# Supplementary material for: Inter-organ transmission of hepatocellular senescence induces multi-organ dysfunction through the TGFβ signalling pathway.
Source: Research Square preprint supplement (doi:10.21203/rs.3.rs-1133747/v1), 2021-12-14
Supplement: Supplementary file 5 [file 23fdc2fdb2f5e369baa03efe.xlsx]

## Sheet: Antibodies
			Antibody (primary)	Supplier	Catalogue No	Dilution	Application
			BrdU	BD Biosciences	347580	1:250	IHC
			Caspase 3	Cell Signaling	9661	1:500	IHC
			Lipocalin-2 (NGAL)	R&D Systems	AF1857 SP	1:200	IHC
			p21	Abcam	ab107099	1:150	IHC
			p53	Leica	NCL-L-p53CM5p	1:750	IHC
			pSMAD2	Cell Signalling	3108S	1:1000	WB
			pSMAD3	Abcam	ab52903	1:1000	WB
			pSTAT3	Cell Signaling	9131	1:100	IHC
			RFP	Tebu-Bio	600-401-379	1:1000	IHC
			SMAD2	Cell Signalling	5339	1:1000	WB
			SMAD3	Cell Signalling	9513S	1:1000	WB
			Sox-9	Millipore	AB5535	1:500	IHC
			β-actin	Sigma-Aldrich	A2228	1/2000	WB
			Antibody (secondary)	Supplier	Catalogue No	Dilution	Application
			Donkey anti-mouse 488	Life Technologies	A-21202	1:200	IHC
			Donkey anti-mouse 555	Life Technologies	A-31570	1:200	IHC
			Donkey anti-rabbit 647	Life Technologies	A-31573	1:200	IHC
			Goat anti mouse HRP	Cell Signalling	7076	1:3000	WB
			Goat anti rabbit HRP	Cell Signalling	7074	1:3000	WB
			Horse anti-rabbit biotinylated	Vector Labs	BP-1100	R.T.U	IHC
