# Supplementary material for: Inter-organ transmission of hepatocellular senescence induces multi-organ dysfunction through the TGFβ signalling pathway.
Source: Research Square preprint supplement (doi:10.21203/rs.3.rs-1133747/v1), 2021-12-14
Supplement: Supplementary file 6 [file aca0dde3d41fb9bf7e931a12.xlsx]

## Sheet: Sheet1
Signature name
p21	Tgfβ signalling	Proliferation	JAK-STAT
Aurka	Acvr1	Mki67	Il6st
Aurkb	Ccn2	Top2a	Il6ra
Anln	Gpc1	Birc5	Socs3
Arhgap11a	Jun	Cenpf	Stat3
Aspm	Mapk13	Rrm2	Tgfb1
Birc5	Pdgfa	Mcm5	Birc5
Cdc20	Smad7	Pcna	Lifr
Cdk2	Sox9	Cenpe	Vim
Cdkn1a	Tgfbr1	Ccna2	Lcn2
Cdkn3		Plk2
Cenpf		Ccnb1
Cenpm		Mcm6
Dlgap5		Mcm3
Gas2l3		Cdc20
Hmmr
Kif11
