# Supplementary material for: Inter-organ transmission of hepatocellular senescence induces multi-organ dysfunction through the TGFβ signalling pathway.
Source: Research Square preprint supplement (doi:10.21203/rs.3.rs-1133747/v1), 2021-12-14
Supplement: Supplementary file 8 [file c6f14e32c903503e39596bf8.xlsx]

## Sheet: Primers
			Primer	Supplier	Catalogue No
			Bcl2	Qiagen	QT00156282
			Cdkn1a	Qiagen	QT00137053
			Cdkn2b	Qiagen	QT00293209
			Lif	Qiagen	QT00111090
			Cdkn2a	Qiagen	QT00252595
			Rn18S	Qiagen	QT02448075
			Tgfb1	Qiagen	QT00145250
			Tgfb2	Qiagen	QT00106806
			Tgfb3	Qiagen	QT00166838
