# Supplementary figures and images for: Inter-organ transmission of hepatocellular senescence induces multi-organ dysfunction through the TGFβ signalling pathway.
Source: Research Square preprint supplement (doi:10.21203/rs.3.rs-1133747/v1), 2021-12-14

**a**

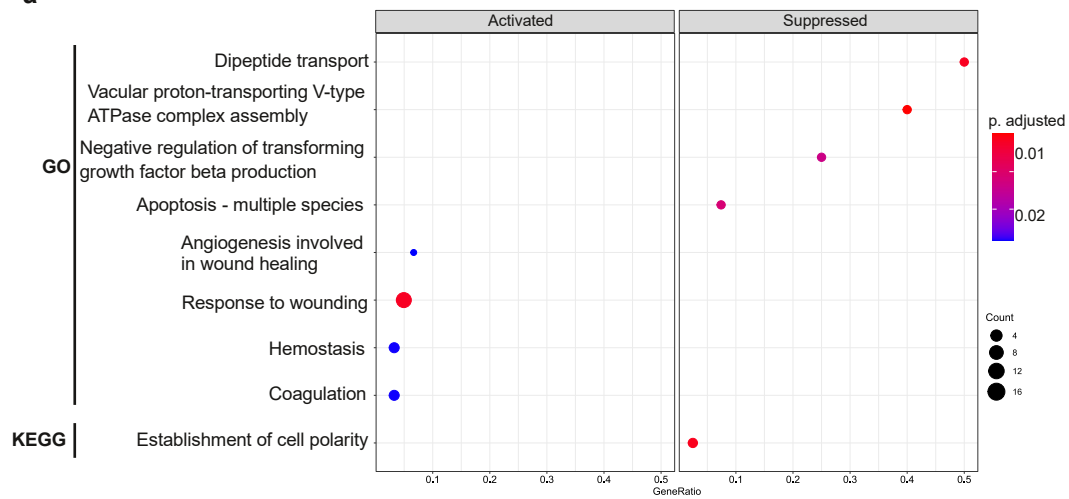

**b** PTC with  $p21_{sig.} \leq 0$  PTC with  $p21_{sig.} > 0$

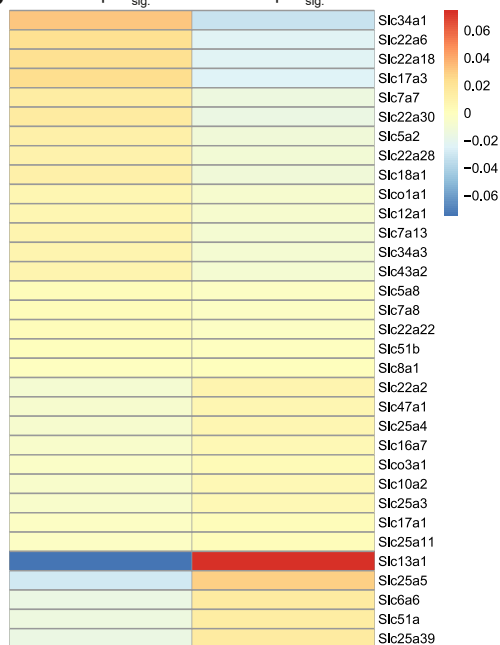

Supplement: Supplementary file 1 [file 2e1a435b794a452027b803f2.pdf]
